# Supplementary material
Source: ML conference proceedings conference paper supplement (https://openaccess.thecvf.com/content/ICCV_2019/html/Elhoseiny_Creativity_Inspired_Zero-Shot_ICCV_2019_paper.html)
Supplement: Supplementary file 1 [file Elhoseiny_Creativity_Inspired_Zero-Shot_ICCV_2019_supplemental.pdf]

Archive with 12 entries (9 files):
- 2548-supp/
- 2548-supp/CIZSL_SupMat.pdf
- __MACOSX/
- __MACOSX/2548-supp/
- __MACOSX/2548-supp/._CIZSL_SupMat.pdf
- 2548-supp/.DS_Store
- __MACOSX/2548-supp/._.DS_Store
- 2548-supp/README.txt
- __MACOSX/2548-supp/._README.txt
- 2548-supp/CIZSL-Code.zip
- __MACOSX/2548-supp/._CIZSL-Code.zip
- __MACOSX/._2548-supp
