# Supplementary material
Source: ML conference proceedings conference paper supplement (https://openaccess.thecvf.com/content/ICCV_2019/html/Elhoseiny_Creativity_Inspired_Zero-Shot_ICCV_2019_paper.html)
Supplement: Supplementary file 1 [file Elhoseiny_Creativity_Inspired_Zero-Shot_ICCV_2019_supplemental.pdf › 2548-supp/README.txt]

Mohamed Elhoseiny, Mohamed Elfeki, Creativity Inspired Zero Shot Learning, Thirty-sixth International Conference on Computer Vision (ICCV), 2019


CIZSL_SupMat.pdf contains the main supplementary document. 

CIZSL-Code.zip includes the code of our method. 
